1 **Willingness and Perceived ability to pay for Uganda’s Proposed National Health Insurance**

2 **Scheme among Informal Sector workers in Iganga and Mayuge districts, Uganda: A**

3 **Contingent Valuation Method.**

4

5 Noel Namuhani<sup>1\*</sup>, Angela Kisakye<sup>1, 2</sup> and Suzanne N Kiwanuka<sup>1</sup>

6

7 *Institutional affiliations*

8 <sup>1</sup>Makerere University School of public health, Department of Health policy planning and

9 management, Uganda

10 <sup>2</sup>African Field Epidemiology Network, Lugogo House, Plot 42, Lugogo By-Pass

11

12 \*Corresponding Author

13 Email: [nnamuhani@musph.ac.ug](mailto:nnamuhani@musph.ac.ug)

14

15

16

17

18 **Abstract**

19 **Background:** Access to health care remains a challenge, especially among the informal sector  
20 workers in most low-income countries, due to high out-of-pocket (OOP) expenditures, with  
21 Uganda spending over 28.0% out of pocket on health care. In response, Uganda has proposed a  
22 national health insurance scheme (NHI). However, the willingness and ability to pay for the  
23 proposed NHI scheme within the informal sector have not yet been explored in Uganda. This  
24 study assessed the willingness and perceived ability to pay for the proposed NHI scheme and its  
25 determinants among the informal sector workers in Iganga and Mayuge districts, Uganda.

26 **Methodology:** A cross-sectional study was conducted in Iganga and Mayuge districts in April and  
27 May 2019. A contingent valuation method using the bidding game technique was used to elicit  
28 the willingness to pay (WTP). A total of 853 informal sector workers, including farmers,  
29 commercial motorists, fishermen, and traders, were randomly sampled. Seven focus group  
30 discussions (FGD) were also conducted. Logistic regression was done to identify the determinants  
31 of willingness to pay for the proposed NHI scheme. Qualitative data was analyzed thematically.

32 **Results:** The majority 695/853, (81.5%) of the respondents were willing to pay for NHI; the  
33 median WTP was UGX 25,000 (USD 6.8) annually; and 633/853, (74.2%) of the respondents  
34 believed that they were able to pay for the health insurance. Willingness to Pay was significantly  
35 associated with being a fisher folk (AOR: 1.70 95%CI: 1.04-2.79, P = 0.035), being in the fourth  
36 wealth quintile (AOR: 2.98, 95% CI: 1.56–5.65), not hearing about health insurance (AOR: 0.50  
37 95%CI: 0.23-0.86, P = 0.032), and not having saving group membership (AOR: 0.51, 95%CI: 0.34-  
38 0.76, P<0.001). Most of the FGD participants were willing to pay for the proposed scheme;

39 however, some of the participants doubted their ability to pay for the scheme given their high  
40 poverty levels and their unstable income.

41 **Conclusion:** The willingness to pay for health insurance in the informal sector is high.  
42 Therefore, it is viable for the government to extend NHI to the informal sector. However,  
43 awareness building and due consideration of high poverty levels in setting appropriate  
44 premiums should be a priority.

45 **Key words:** National Health insurance scheme, Willingness to pay, Ability to pay, informal sector,  
46 Contingent Valuation method.

47

## 48 **Introduction**

49 Access to health care remains a big challenge, especially among the informal sector in most low-  
50 income countries (1, 2), mainly due to high out-of-pocket (OOP) expenditures (3). This put about  
51 150 million people at risk of catastrophic healthcare costs annually, driving over 100 million  
52 people into poverty worldwide (3). According to the World Bank, direct modes of payment for  
53 health care services constitute 40% of health care expenditure in developing countries (4).

54 In Uganda, although the national health accounts reported a reduction in the out-of-pocket  
55 expenditure on health as a share of current health expenditure (CHE) from 38.6% in the financial  
56 year 2018/2019 to 27.4% in the financial year 2020/2021, the OOPE remains significantly high  
57 (5). Accessing healthcare is associated with several expenses, including transport, drugs,

58 diagnostics, and consultancy fees, among other expenses related to personnel and capital costs  
59 (6).

60 In Uganda, over 80% of the labor force belongs to the informal sector (7). These include peasant  
61 farmers, commercial cyclists, fishermen, and those employed in unregistered or small-scale  
62 enterprises. It is estimated that 59% of the people in the informal sector in Eastern Uganda  
63 cannot afford to access quality health care due to high poverty levels and OOP for health care  
64 (8).

65 Globally, the implementation of health insurance schemes is one of the major responses to  
66 addressing out-of-pocket payments for health care (3, 9) in low and middle-income countries.  
67 Health insurance has the ability to reduce financial barriers to health care access and protect  
68 individuals and families against the risk of unpredictable health care expenditures, hence aiding  
69 the attainment of UHC (10). This has improved access to healthcare, especially in developed  
70 countries.

71 High coverage and enrollment in the health insurance scheme are critical for the success and  
72 sustainability of the scheme. However, enrolment in health insurance schemes remains low,  
73 ranging from 2% to 40% in most African countries (11-13). The poor enrolment rates in the  
74 different countries have been attributed to a number of factors, including low incomes, large  
75 household sizes, long distances to health facilities, limited awareness, poor quality of health care  
76 services, inappropriate benefit packages, a lack of trust in the systems, and high illiteracy levels,  
77 especially in the informal sector (14-16). The informal sector workers are sometimes of low  
78 socioeconomic status compared to the formal sector workers, hence having a lower ability to pay

79 for health insurance (16). Furthermore, the informal sector is not well organized; they have  
80 unpredictable incomes, making it difficult to enroll and register them into the NHI scheme and  
81 collect regular contributions from them (13, 17).

82 Uganda is in the process of developing a NHI scheme to address the high OOP and access to  
83 services. However, given the high poverty levels among Ugandans and more so in the informal  
84 sector, the policy question of how much money people are willing to spend and their ability to  
85 pay remains unanswered. Eastern Uganda is the poorest region in Uganda, with 35.7% of most  
86 households living below the poverty line (7). The willingness to pay for the proposed NHI scheme,  
87 especially within the informal sector, which makes up 80% of Uganda's population, is critical to  
88 the achievement of equity in access to care and the core risk pooling function of a health  
89 insurance scheme. This would translate into high enrollment rates, which foster the financial  
90 sustainability of the schemes (10).

91 The national health insurance bill, 2019, proposes that the scheme will be mandatory for all  
92 Ugandans, and each person is to pay a premium that will be determined by the board. The bill  
93 was passed by parliament in 2021 but was not assented to by the president due to disagreements  
94 among stakeholders who were not consulted. As of 2024, the bill is being discussed by the  
95 Ministry of Health and stakeholders before being re-tabled in the Parliament of Uganda.

96 There is a paucity of information on the willingness and ability to pay for the proposed NHI,  
97 especially within the informal sector. Therefore, this study aimed at documenting the willingness  
98 to pay and the perceived ability to pay for the proposed NHI and factors that influence willingness

99 to pay for the proposed NHI scheme among the informal sector workers. This study's findings will  
100 be used by the MOH in determining affordable premiums and how they should be paid.

## 101 **Materials and Methods**

102 **Study design:** This was a cross-sectional study design that involved mixed methods of data  
103 collection. This study adopted a contingent valuation method (CVM) using the bidding game  
104 technique to directly elicit or measure willingness to pay for a hypothetical (not yet on the  
105 market) health insurance package (18). This approach has been used because it has been proven  
106 to be an effective way of assessing willingness to pay with minimal bias for goods that are not  
107 presently available on the market. The CVM creates a hypothetical marketplace in which no  
108 actual transactions are made; hence, this approach has been successfully used for commodities  
109 that are not exchanged in regular markets. This approach makes the assumption that people have  
110 had no previous experience buying the health service that is going to be put on the market and  
111 instead asks people their willingness to pay on the basis of their expectations and the benefits  
112 attached to the service (19). In the absence of markets for public goods, this method presents  
113 consumers with hypothetical markets in which they have the (hypothetical) opportunity to buy  
114 the good in question. Since the elicited WTP values are contingent upon the particular  
115 hypothetical market described to the respondent, this approach is called the contingent  
116 valuation method (20).

117 **Study setting:** The study was conducted in the Iganga and Mayuge districts of eastern Uganda.  
118 Iganga and Mayuge districts were selected purposively because they are the most poverty-hit  
119 districts in the country and 80% of the population lives in rural areas. They also have 80–85% of

120 the population belonging to the informal sector (7). Iganga District is bordered by Kaliro District  
121 to the north, Bugweri District to the east, Mayuge District to the south, Jinja District to the  
122 southwest, and Luuka District to the west. With a total population of 504,197 people, 9.9% of the  
123 households are 5 km or more from the nearest health facility, and 19.9% are near a public health  
124 facility (UBOS, 2016). It is composed of 3 counties, 8 sub counties, 66 parishes, and 395 villages.  
125 The major economic activity is farming. Mayuge district is located in south-eastern Uganda with  
126 a population of 473,2394 and a growth rate of 3.5%, and it has thirteen subcounties. The major  
127 economic activities are farming and fishing. Mayuge district is bordered by Lake Victoria to the  
128 south, as well as Jinja and Bugiri districts. It has a total of 33 landing sites where fishing activities  
129 take place.

130 **Study Population:** The study targeted the four major categories of informal sector workers: 1)  
131 farmers; 2) fishermen; 3) commercial cyclists; and 4) the business community (traders and  
132 market vendors) in the study area. The informal sector was chosen because they make up the  
133 largest (80%) portion of the population, without which the sustainability of the scheme will be  
134 questionable.

135 **Sample Size:** The sample size was calculated using the Kish Leslie formula (21), considering a 95%  
136 confidence interval, a 50% expected level of WTP, a 5% level of precision, a design effect of 2,  
137 and a 10% non-response rate. This gave a total sample size of 853 informal sector workers. Four  
138 focus group discussions were conducted with women (four FGDs), and three FGDs were  
139 conducted with men (in the informal sector). This number depends on the level of information  
140 saturation. This was determined by doing preliminary analysis while still in the field.

141 **Sampling Procedure:** Stratified random sampling was used in this study. For Iganga district, the  
 142 informal sector workers were divided into three major categories (strata): farmers, commercial  
 143 cyclists, traders/market vendors. In Mayuge district, the informal sector workers were divided  
 144 into four categories: fishermen, farmers, commercial cyclists, and market vendors. A random  
 145 sample from each stratum was taken in a number proportional to the stratum's size when  
 146 compared to the population. In Iganga district, two subcounties were randomly selected, and five  
 147 villages from each subcounty were also randomly selected. A proportionate sample of 286  
 148 households from the 10 villages was selected, and the household heads were systematically  
 149 selected for interviews. Seven *bodaboda* stages located along main roads and junctions were  
 150 randomly selected, and 10 cyclists available at the time of the study were randomly selected to  
 151 participate in the interviews. A total of 84 traders were selected systematically from the two main  
 152 markets for interviews. In Mayuge district, a total of 10/33 landing sites were randomly selected,  
 153 and 248 fishermen were selected from the 10 landing sites proportionate to size. Sixty-two  
 154 traders were randomly selected from three main markets systematically, and 62 *bodaboda*  
 155 cyclists were randomly selected from six stages located along main roads in Mayuge town (Table  
 156 1). Men and women from each of the categories were purposively selected for the focus group  
 157 discussions.

158 **Table 1: Sampling procedure per category of informal sector**

| <b>Iganga district (Iganga district planning office, 2018)</b> |                         |                            |                        |                   |
|----------------------------------------------------------------|-------------------------|----------------------------|------------------------|-------------------|
| <b>Category</b>                                                | <b>Farmers/peasants</b> | <b>Commercial cyclists</b> | <b>Traders/vendors</b> | <b>Fisherfolk</b> |
| Proportion in the district                                     | 0.65                    | 0.16                       | 0.19                   |                   |
| Sample size                                                    | (0.65*440) =286         | (0.16*440) =70             | (0.19*440) =84         | -                 |



|                            |                                                                                                                         |                                                                                                                                         |                                                                          |                                                                                                                  |
|----------------------------|-------------------------------------------------------------------------------------------------------------------------|-----------------------------------------------------------------------------------------------------------------------------------------|--------------------------------------------------------------------------|------------------------------------------------------------------------------------------------------------------|
| Selection procedure        | 2 sub counties (SC) and 5 villages from each SC were randomly selected. Households proportionate to size selected.      | 7 <i>Boda boda</i> stages in the town were randomly selected, cyclists on stage randomly selected to be interviewed                     | Traders were systematically selected for the interviews two main markets | -                                                                                                                |
| Mayuge district            |                                                                                                                         |                                                                                                                                         |                                                                          |                                                                                                                  |
| <b>Category</b>            | <b>Farmers/peasants</b>                                                                                                 | <b>Commercial cyclists</b>                                                                                                              | <b>Traders/vendors</b>                                                   | <b>Fisherfolk</b>                                                                                                |
| Proportion in the district | 0.1                                                                                                                     | 0.15                                                                                                                                    | 0.15                                                                     | 0.6                                                                                                              |
| Sample size                | (0.1*413) =41                                                                                                           | (0.15*413) =62                                                                                                                          | (0.15*413) =62                                                           | (0.6*413) =248                                                                                                   |
| Selection procedure        | One sub county and two villages were randomly selected, the number of households were determined proportionate to size. | 6 <i>Boda boda</i> stages in town were randomly selected, later cyclists on stage at that time were randomly selected to be interviewed | Traders were systematically selected from 3 main markets                 | 10/33 landing sites were randomly selected. Fishermen at each site were randomly selected, proportionate to size |
| <b>Total samples</b>       | <b>327</b>                                                                                                              | <b>132</b>                                                                                                                              | <b>146</b>                                                               | <b>248</b>                                                                                                       |

159

160 **Data collection methods and tools**

161 The willingness to pay was assessed using a contingent valuation method using the “bidding  
162 game” technique. The bidding game was used to determine the maximum premium that a  
163 respondent is willing to pay for the proposed NHI plan. A bidding game technique was chosen  
164 because of its ease of implementation and its minimal biases. In addition, many studies have  
165 found the bidding game to be very reliable (22, 23). The respondent was asked if he or she was  
166 willing to pay the starting bid. If the respondent agreed, the interviewer would raise the bid by  
167 10% of the first bid and again ask if the respondent was willing to pay the new bid. The

168 interviewer continued to present the different bids until the respondent expressed an  
169 unwillingness to pay. On the other hand, if the respondent expressed unwillingness to pay the  
170 starting bid, the interviewer lowered the bid by 10% and repeated the query. This was continued  
171 until a bid was reached where the respondent was willing to pay. The starting bid was 20,000  
172 UGX (5.4 USD), since this was the average premium for beneficiaries in the existing community-  
173 based health insurance schemes in Luweero, Western Uganda, and Jinja. The proportion of those  
174 willing to pay, the average, and the median amount of money people were willing to pay were  
175 computed. The perceived ability to pay was measured by asking respondents whether they were  
176 able to pay premiums for health insurance per year and how much they could afford without  
177 foregoing other basic needs.

178 A semi-structured questionnaire was used to collect quantitative data such as  
179 sociodemographics, WTP, perceived ability to pay, and associated factors from informal sector  
180 workers. The data was collected in April and May 2019. The data collection tools were translated  
181 to the local language and then back translated to English to check whether the translated  
182 questions still held informational validity. The principal investigator recruited and trained  
183 research assistants so that they were familiar with the statement of the problem, objectives of  
184 the study, sampling procedure, data collection tools, and plan for data collection. Research  
185 assistants were oriented to the bidding game technique for assessing WTP. They were also taught  
186 the meaning of health insurance and how it intends to be operationalized in the country.  
187 Research assistants were also trained on the basic interview techniques, such as asking questions  
188 in a neutral manner, not showing by words or actions what answers were being expected of the  
189 study participants, and how to record answers, especially from open-ended questions, without

190 interpreting them. The data collection tools were pre-tested in the neighboring district, Bugweri  
191 district. This was done to test the validity and ease of application of the tools. Filled electronic  
192 forms were checked at the point of data collection for completeness, and those found incomplete  
193 were completed before the respondent was discharged. The data were cleaned and edited by  
194 the research assistants before they submitted the complete forms to the server.

195 Focus group discussion (FGD) guides were also used to collect data from informal sector workers  
196 to understand the determinants of willingness to pay and their perceived ability to pay for the  
197 NHI. The FGDs were audio-taped. The FGD was composed of 6–8 participants. The discussion had  
198 a moderator and a note-taker, and the discussions lasted for an average of one hour. These were  
199 conducted in the local language, and these were audio recorded.

200 **Data management and analysis:** The quantitative data were downloaded from the server and  
201 imported into STATA 14 for cleaning and analysis. Descriptive statistics, including mean, median,  
202 standard deviations, frequencies, and percentages, were obtained. The information was  
203 presented in frequency distribution tables. Principal component analysis was done to generate  
204 wealth quintiles using the demographic health survey categorization. The wealth quintiles were  
205 generated based on nine household items, which included possession of a car, motorcycle,  
206 bicycle, radio, television, mobile phone, piece of land, owning a house, and having animals.  
207 Inferential statistics were obtained using logistic regression. This was done in two stages: 1)  
208 bivariate analysis was done to determine the potential variables associated with willingness to  
209 pay for health insurance. Crude odds ratios at a 95% confidence interval were obtained to  
210 measure the potential association. 2) A multivariate analysis was done to determine the actual

211 factors associated with WTP. All variables that were statistically significant at bivariate analysis  
212 and the important factors known in the literature to be statistically significant, such as socio-  
213 economic status, occupation, and potential confounders like residence, were included in the  
214 model. Variables were tested for multicollinearity before being included in the model. The model  
215 was built step-by-step while testing it using lfit until the best model was obtained. Variables that  
216 remained statistically significant at 95% confidence were considered the factors associated with  
217 WTP for health insurance. Adjusted odds ratios were obtained as measures of association.

218 Qualitative data was analyzed manually using a thematic-inductive approach. The recordings  
219 were transcribed verbatim and translated from the local language (Lusoga) to English. Transcripts  
220 were read by more than two independent analysts who identified codes, sub-themes, and then  
221 organized them into themes. The information was triangulated with the quantitative data  
222 findings to gain a deeper understanding.

### 223 **Ethics statement**

224 The study was approved by the Makerere University, School of Public Health Higher Degrees,  
225 Research and Ethics Committee (HDREC). At the district level, permission to conduct the study  
226 was obtained from the local leaders and the District Health Office. Permission was also sought  
227 from subcounty chiefs and local council one chairpersons. The informed written consent of each  
228 individual participant was obtained at the start of the study. Confidentiality and anonymity were  
229 maintained by the use of codes.

### 230 **Results**

231 **Background Characteristics of the Respondents**

232 Of the 853 respondents who participated in the study, 327 (38.3%) were peasant farmers,  
233 248929.1%) were fishermen, 146 (17.1%) were business people, and 132 (15.5%) were  
234 commercial cyclists. The mean age of the respondents was 37.0 years (SD  $\pm$  11.3). The majority  
235 667/853 (78.2%) of the respondents were males, 783/853 (91.8%) of the household heads were  
236 males, and 618/853 (72.4%) resided in rural areas. The average household size was 5 persons.  
237 The median monthly income was UGX 150,000 (USD 40.5). Only 158/853 (18.5%) were in the  
238 wealthiest quintile, while 349/853 (41.0%) of the households were in the second and poorest  
239 wealth quintiles (Table 2).

240 **Table 2: Background Characteristics of the Respondents**

| Variable                         | Frequency (N=853) | Percentage (%) |
|----------------------------------|-------------------|----------------|
| <b>Sex of respondent</b>         |                   |                |
| Male                             | 667               | 78.2           |
| Female                           | 186               | 21.8           |
| <b>Sex of the household head</b> |                   |                |
| Male                             | 783               | 91.8           |
| Female                           | 70                | 8.2            |
| <b>Residence</b>                 |                   |                |
| Rural                            | 618               | 72.4           |
| Urban                            | 235               | 27.6           |
| <b>Marital status</b>            |                   |                |
| Married                          | 694               | 81.4           |
| Single                           | 85                | 10.0           |
| Separated                        | 48                | 5.6            |
| Widowed                          | 26                | 3.0            |
| <b>Age category</b>              |                   |                |
| 18-25                            | 124               | 14.5           |
| 26-35                            | 303               | 35.5           |
| 36-45                            | 239               | 28.0           |
| 46-55                            | 126               | 14.8           |
| 56 above                         | 61                | 7.2            |

|     |                         |     |      |
|-----|-------------------------|-----|------|
| 241 | <b>Education level</b>  |     |      |
|     | None                    | 51  | 6.0  |
| 242 | Primary                 | 445 | 52.2 |
|     | Secondary               | 280 | 32.8 |
|     | Tertiary                | 77  | 9.0  |
| 243 | <b>Religion</b>         |     |      |
|     | Muslim                  | 304 | 35.6 |
|     | Protestant              | 276 | 32.4 |
| 244 | Catholic                | 194 | 22.7 |
|     | Born again              | 53  | 6.2  |
| 245 | SDA                     | 26  | 3.1  |
|     | <b>Occupation</b>       |     |      |
|     | Farmer                  | 327 | 38.3 |
| 246 | Fishermen               | 248 | 29.1 |
|     | Business                | 146 | 17.1 |
|     | <i>Bodaboda</i>         | 132 | 15.5 |
| 247 | <b>Wealth quintiles</b> |     |      |
|     | Poorest (<-1.39)        | 172 | 20.2 |
| 248 | Poor (-1.40 - -0.50)    | 177 | 20.8 |
|     | Moderate (-0.51 -0.29)  | 163 | 19.1 |
|     | Wealthy (0.30 -1.23)    | 183 | 21.5 |
| 249 | Wealthiest(1.24-4.14)   | 158 | 18.5 |

250

251

252

253

254

255

256

257

258

259

## 260 **Willingness to Pay for the Proposed NHI**

261 The majority 695/853 (81.5%) of the respondents were willing to pay for the proposed NHI. Of  
262 those willing to pay, the median willingness to pay was UGX 25,000 (USD 6.8) while the mean  
263 WTP was UGX 28,950 (USD 7.8) per person, inclusive of 4 dependents per year. Only 3.8%  
264 protested contributing to the scheme, and 126/853 (14.7%) gave WTP zero because they  
265 believed they were too poor to pay for national health insurance (Table 3).

266 Qualitatively, most of the FGD participants were also willing to make contributions for health  
267 insurance. However, others resented making contributions, as noted below:

268 *"Sincerely, the government is meant to provide all the medical services. So, there is no way*  
269 *that you can lie to us and say that the government can't provide those services..." (FGD*  
270 **male-fishermen-Mayuge)**

271 A number of FGD participants were not willing to pay because of poverty, while others criticized  
272 the government's misuse of taxes collected from the tax payer on salaries for officials rather than  
273 on health services, as noted in the quotes below.

274 *"The fact is that poverty is the biggest hindrance. Because at times you can fall sick, yet*  
275 *you don't have money, and you resort to borrowing from colleagues who may not even be*  
276 *able to help you out because they also don't have. So generally, I disagree with paying for*  
277 *health insurance." (FGD-Business Women, Mayuge District)*

278 *"I am not willing to pay because we are always charged a lot of tax to register our*  
 279 *businesses. That is all tax. Where does that tax go? Let them reduce the salary of Members*  
 280 *of Parliament so that part of it is utilized to buy medicine. Members of Parliament have*  
 281 *no importance in our area."* (FFGD-Male-fishermen-Mayuge district)

282 **Willingness to Pay with Copayments:**

283 A copayment is a cost-sharing arrangement where one covers a portion of the costs out of pocket  
 284 each time one visits the health facility. Less than half, 309/695 (44.5%) of the respondents, were  
 285 willing to co-pay. The mean co-pay amount was UGX 2,650 (USD 0.7), with a median of UGX 2000  
 286 (USD 0.5), each time someone accessed services. The average maximum amount of money that  
 287 respondents were willing to pay with the copayment was UGX 23,000 (USD.6.2) and the median  
 288 was UGX 20,000 (USD.5.4) (Table 3).

289 **Table 3: Willingness to Pay for the Proposed NHI annually**

| WTP                       | Frequency (%) | Mean          | Median        |
|---------------------------|---------------|---------------|---------------|
| Protests (WTP=0)          | 32 (3.8)      | 0             | 0             |
| WTP=0                     | 126 (14.7)    | 0             | 0             |
| WTP>0                     | 695(81.5)     | <b>28,950</b> | <b>25,000</b> |
| Total                     | 853 (100.0)   | 23,600        | 20,000        |
| <b>Copayment scenario</b> |               |               |               |
| Amount willing to copay   | 309/695(44.5) | <b>2,650</b>  | <b>2,000</b>  |
| WTP with co payment       | 309/695(44.5) | 23,000        | 20,000        |

290 **Notes;** Protests-those protested attaching valuing to HI (WTP=0 but it has no economic sense).

291 WTP=0 means willingness to pay is actually zero. WTP>0 that it is positive -WTP is above zero.

292 Qualitatively, most of the FGD participants were not in support of copayments, as expressed by  
 293 one of the FGD participants.



294 *"I also do not support the idea that we pay money each time we visit the health facility,*  
295 *especially when we are paying every year. This will make people unable to access the*  
296 *services, and hence the problem of access to services will not have been solved. People*  
297 *are already poor, and that will mean people will continue to sell their property to go to*  
298 *health facilities."* (FGD Male Farmer)

### 299 **Preferred Mode of Payment**

300 Most (54.1%) respondents preferred to pay annually, while 21.0% preferred to pay per  
301 harvesting season. Only 13.1% wanted to pay according to their monthly income, with the  
302 majority (63.1%) preferring to pay 1 percent of their monthly income, followed by those who  
303 were willing to pay 5%.

### 304 **Perceived Ability to Pay for the Health Insurance Scheme**

305 More than half 633/853 (74.2%) of the respondents believed that they were able to pay for  
306 health insurance, with a mean of UGX 23,000 (USD.6.2) and median of UGX 20,000 (USD.5.4)  
307 per person per year.

308 Regarding the perceived ability to pay, most of the FGD participants noted that most of the  
309 people are poor and most likely may not be able to make periodic subscriptions, especially if  
310 the money is raised more than what people earn. This was attested to, as indicated below:

311 *"Sincerely speaking, some people cannot afford to pay money; for instance, you may find*  
312 *a very old person who is no longer earning anything, yet they also need health care."*

313 **(FGD-Boda-boda-Iganga district)**

314 Another FGD participant, who was a business lady, noted that

315 *"I support the idea. But not very much because of the issue of affordability. Not everyone*  
316 *can afford to pay, and note that we earn differently. Because some of us play the role of*  
317 *mother and father in the family, there are a lot of requirements to provide." (FGD*  
318 **Business Women, Iganga)**

319 Furthermore, most of the participants noted that setting premiums should be based on  
320 people's income and ability to pay, as noted below:

321 *"Since everyone earns differently, the charges should depend on how much someone*  
322 *earns. I could be in a position to afford UGX 50,000, but yet my colleague cannot at all*  
323 *since people in the village are used to getting free medicine. When some people are*  
324 *asked to pay just 500shs for drugs, they will consider it unworthy because they know*  
325 *that drugs/medication are freely given. So, if possible, we charge according to*  
326 *people's income." (FGD: business women, Iganga district).*

### 327 **Determinants for level of Willingness to Pay for Health Insurance Scheme**

328 At bi-variable analysis, wealth quintiles, having savings group membership, having a family  
329 member with chronic illness, use of traditional medicine, and hearing about health insurance  
330 were statistically significant for willingness to pay for health insurance. The odds of being willing  
331 to pay when in the fourth wealth quintile were 2.88, compared to the odds of being willing to  
332 pay among those in the poorest category (COR: 2.88, 95% CI: 1.60–5.18, P<0.001). Not being in  
333 the saving group reduced the chances of being willing to pay for health insurance by 42%

334 compared to those who had saving group memberships (COR: 0.58, 95% CI: 0.33-0.69, P<0.001)  
 335 (Table 4).

336 After adjusting for any confounding factors, occupation, wealth, saving group membership, use  
 337 of traditional medicine, and having heard about health insurance were significantly associated  
 338 with the level of willingness to pay for the proposed health insurance scheme.

339 The odds of fishermen's willingness to pay for health insurance were 1.70 compared to those of  
 340 farmers after adjusting for other factors (AOR: 1.70, 95% CI: 1.04–2.79, P = 0.035). Respondents  
 341 in the fourth wealth quintile were 2.98 times more likely to pay for health insurance compared  
 342 to those in the poorest wealth quintile (AOR: 2.98, 95% CI: 1.56–5.65). Respondents who were  
 343 not in any saving group were 0.51 times less likely to pay for the proposed health insurance  
 344 compared to those with saving group membership (AOR: 0.51, 95% CI: 0.34-0.76, P<0.001), and  
 345 individuals who had never heard about HI were 50% less willing to pay for the proposed National  
 346 Health Insurance compared to those who had ever heard about health insurance (AOR: 0.50, 95%  
 347 CI: 0.23-0.86, P = 0.032) (Table 4).

348 **Table 1: Multi variable analysis of factors associated with WTP for NHI scheme.**

| Variable                 | Level of Willingness to pay |             | COR (95%CI)     | AOR (95%CI)     |
|--------------------------|-----------------------------|-------------|-----------------|-----------------|
|                          | No (n=158)                  | Yes (n=695) |                 |                 |
| <b>Sex of respondent</b> |                             |             |                 |                 |
| Male                     | 127(80.4)                   | 540(77.7)   | 1.0             |                 |
| Female                   | 31(19.6)                    | 155(22.3)   | 1.18(0.76-1.81) | 1.30(0.80-2.11) |
| <b>Residence</b>         |                             |             |                 |                 |
| Rural                    | 110(69.6)                   | 508(73.1)   | 1.0             |                 |
| Urban                    | 48(30.4)                    | 187(26.9)   | 0.84(0.58-1.23) | 1.09(0.52-2.26) |
| <b>Occupation</b>        |                             |             |                 |                 |

|                                           |           |           |                 |                    |
|-------------------------------------------|-----------|-----------|-----------------|--------------------|
| Farmer                                    | 60(38.0)  | 267(38.4) | 1.0             |                    |
| Business                                  | 32(20.2)  | 114(15.4) | 0.80(0.49-1.30) | 0.59(0.26-1.35)    |
| Boda boda                                 | 25(15.8)  | 107(15.4) | 0.96(0.57-1.61) | 1.04(0.50-2.18)    |
| Fishermen                                 | 41(26.0)  | 207(29.8) | 1.13(0.73-1.76) | 1.70(1.04-2.79) *  |
| <b>Wealth quintiles</b>                   |           |           |                 |                    |
| Poorest                                   | 43(27.2)  | 129(18.6) | 1.0             |                    |
| Second poorest                            | 32(20.3)  | 145(20.9) | 1.51(0.90-2.53) | 1.83(1.05-3.19) *  |
| Middle                                    | 35(22.1)  | 128(18.4) | 1.22(0.73-2.03) | 1.23(0.70-2.14)    |
| Fourth                                    | 19(12.0)  | 164(23.6) | 2.88(1.60-5.18) | 2.98(1.58-5.65) *  |
| Wealthiest                                | 29(18.4)  | 129(18.6) | 1.48(0.87-2.52) | 1.53(0.81-2.88)    |
| <b>In saving group</b>                    |           |           |                 |                    |
| Yes                                       | 49(31.0)  | 337(48.5) | 1.0             |                    |
| No                                        | 109(69.0) | 358(51.5) | 0.48(0.33-0.69) | 0.51(0.34-0.76) ** |
| <b>Family member with chronic illness</b> |           |           |                 |                    |
| Yes                                       | 36(22.7)  | 241(34.7) | 1.0             |                    |
| No                                        | 122(77.2) | 576(67.5) | 0.56(0.37-0.83) | 0.73(0.46-1.14)    |
| <b>Ability to meet health care</b>        |           |           |                 |                    |
| Difficult                                 | 112(70.9) | 571(82.2) | 1.0             |                    |
| Easy                                      | 46(29.1)  | 124(17.8) | 0.53(0.36-0.78) | 0.68(0.43-1.05)    |
| <b>Use Traditional Medicine</b>           |           |           |                 |                    |
| No                                        | 59(38.8)  | 345(51.4) | 1.0             |                    |
| Yes                                       | 93(61.2)  | 326(48.6) | 0.60(0.42-0.86) | 0.71(0.48-0.92) *  |
| <b>Ever heard about NHI</b>               |           |           |                 |                    |
| Yes                                       | 9(5.7)    | 83(11.9)  | 1.0             |                    |
| No                                        | 149(94.3) | 612(88.1) | 0.45(0.22-0.91) | 0.50(0.23-0.86) *  |

349 Note: \*\*  $p < 0.001$ , \*  $P < 0.05$

350

351 **Discussions**

352 Firstly, this study is unique in its assessment of the level of WTP, perceived ability to pay, and  
353 determinants of WTP for the proposed national health insurance scheme among the informal  
354 sector workers in Uganda, who constitute 80% of the Ugandan population. These findings are  
355 pertinent if the proposed NHI is to achieve adequate coverage. Secondly, the study applied a  
356 contingent valuation approach using a bidding game technique to hypothetically elicit the  
357 informal sector's willingness to pay. The highlight of this study is the high level of willingness to  
358 pay for NHI among informal sector workers, as well as their preferred modes of engagement.  
359 These findings provide valuable insights for fine-tuning the proposed NHI.

360 The level of WTP for the proposed NHI was high, with a median willingness to pay of UGX 25,000  
361 (USD 6.8) and a mean WTP of UGX 28,950 (USD 7.8) per person, inclusive of 4 dependents per  
362 year. This level of willingness to pay was higher than the reported WTP in Nepal (71%) and in  
363 South Sudan (68%) among the informal sector (13, 24). However, the maximum amount of  
364 money people were willing to pay was lower than the 5.5 USD per person per month in Iran, 6.6  
365 USD per person per month in Namibia, and 3 USD in Kenya per month (18, 24, 25). The differences  
366 in WTP across the different countries could be due to the differences in the socio-economic status  
367 of the different populations in the different countries. The high level of willingness to contribute  
368 to health insurance highlights high chances of the scheme being successful. However, the  
369 suggested premium being higher than the stated WTP may hinder many from participating in the  
370 scheme. But this also brings up the policy question of whether the WTP can sustain the scheme.  
371 Thus, there is a need for careful revision of the premiums before Parliament passes the NHI bill.  
372 The ability to pay is another important consideration when planning to implement health  
373 insurance, especially among the informal sector, whose incomes are unpredictable. A high

374 number of participants believed that they could afford to make periodic contributions to the  
375 health insurance scheme in this study. This finding further highlights the potential for the NHI to  
376 succeed if the informal sector is included. However, the ability to pay needs to be considered  
377 when setting premiums, given the fact that less than 20% of the studied population were in the  
378 wealthiest category.

379 Although more than half of the respondents earned more than 100,000 UGX (27 USD) a month,  
380 there are substantial sections of the informal sector that will struggle to pay for health insurance,  
381 and therefore, these will require significant government subsidies to be included. This further  
382 highlights the need to consider the idea of making contributions as a proportion of people's  
383 earnings and wealth status because it would make people pay according to their ability and is  
384 more equitable than just having a flat figure for all people. Moreover, by virtue of the  
385 unpredictable nature of their income, informal sector workers expressed the desire to have  
386 premiums synchronized to earning cycles such as harvest seasons. This implies that the NHI will  
387 have to explore flexible premium schedules for informal sector workers in order to enhance their  
388 uptake of the scheme. In Ethiopia, making premium systems more flexible eased payments (26).

389 In this study, having a savings group membership increased the likelihood of willingness to pay  
390 for the proposed national health insurance scheme. In Asian countries, saving groups were  
391 reported to be key in initiating community-based health insurance schemes (27). Savings groups  
392 provide members with a secure place to save money, generate a pool fund, and have the  
393 opportunity to borrow in small amounts. They also provide affordable basic insurance services  
394 and enable the community to meet the premiums(27). Local savings groups have become one of  
395 the most famous financial support systems in rural Uganda over the last decade (28). Savings and

396 burial groups present an opportunity to leverage in enhancing access to health care in rural  
397 communities. This implies that as countries plan to initiate NHI, saving groups can become a great  
398 resource to tap into to ensure community participation and payment of the premiums for the  
399 scheme.

400 Participants belonging to the highest wealth category were more likely to pay for the proposed  
401 national health insurance scheme. This is in agreement with studies conducted in Nigeria,  
402 Ethiopia, and Ghana, which have reported that socio-economic factors such as poverty, income,  
403 or wealth status have a bearing on the ease or difficulty of enrolling in a given scheme, with high  
404 premiums deterring enrollment in schemes (29-31). Similar studies conducted in Sierra Leone  
405 and Iran showed that the WTP for the HI scheme depended on the monthly income of the  
406 respondent (25, 32) . In Nepal, belonging to a lower wealth quartile was associated with a lower  
407 willingness to pay for National Health Insurance Scheme (33). This therefore underscores the  
408 need for income generating projects to be implemented within the communities to aid them  
409 make contributions for health insurance.

410 The use of traditional medicine was negatively associated with participation in the health  
411 insurance scheme. This is because members who use traditional medicine see no need to utilize  
412 modern health care services, making them less likely to pay for health insurance. Studies have  
413 shown that the presence and use of alternative medicine and other forms of healthcare, such as  
414 herbalists, negatively affects participation in a health insurance scheme since insurance requires  
415 regular use of modern medicine. Studies conducted in Cameroon, Burkina Faso, Nigeria, and India  
416 have reported that those who use modern medicine are more willing to pay for health insurance  
417 than those who use traditional medicine (34-36). In Uganda's pluralistic health system, the

418 ministry of health and other mandated regulatory bodies need to institute measures that not  
419 only regulate the alternative sector but ultimately attract people to use modern medicine as  
420 opposed to traditional medicine.

421 It is not surprising that those who had never heard about health insurance had 50% less WTP  
422 compared to those who had prior information about health insurance. Indeed, the level of  
423 knowledge on how health insurance operates was very low, and statistical tests of significance  
424 could not be used in this study. However, one systematic review and meta-analysis of factors  
425 influencing WTP for voluntary contributory health insurance schemes in LMICs has revealed that  
426 knowledge and understanding of the functioning of the scheme positively influence the  
427 willingness to pay for and participate in the scheme (37, 38). As the Ugandan government moves  
428 to implement health insurance, information, education, and communication will be paramount  
429 to the success of the proposed scheme.

430 **Study Limitations:** As with most contingent valuation studies, the elicitation technique is always  
431 subject to bias, and the assignment of the first bid or amount is also biased. However, this was  
432 triangulated with an open-ended question and qualitative data. The low level of knowledge about  
433 health insurance among respondents was also a limitation for attaching value to the proposed  
434 scheme. This was solved by educating the respondent about health insurance before eliciting a  
435 willingness to pay.

#### 436 **Conclusions**

437 This study indicated a high level of WTP, and the majority believed they could afford to pay for  
438 the health insurance scheme. However, studies on the ability to pay need to be conducted, as



439 this study is based on the perceived ability to pay for health insurance schemes. The high level of  
440 WTP indicates that the informal sector is willing to make a contribution to their health, making it  
441 feasible for the government to propose a flexible and affordable scheme within which the  
442 informal sector can bear some costs towards their health care. To support the ability to pay, there  
443 is a need to build local solidarity groups and strengthen local initiatives to aid poor members.

#### 444 ***Declarations***

#### 445 **Consent for publication**

446 Not Applicable

#### 447 **Availability of data and materials**

448 The datasets analyzed for this study are available from the corresponding author on reasonable  
449 request.

#### 450 **Competing interests**

451 The authors declare that they have no competing interests

#### 452 **Funding**

453 The author(s) received no specific funding for this work

#### 454 **Authors' contributions**

455 NN, SNK, AK conceived the study, NN collected, analyzed and wrote the first draft of the  
456 manuscript. SNK and AK provided reviews on all drafts of manuscript. All the authors read and  
457 approved the final manuscript.

## 458 **Acknowledgements**

459 We wish to thank the District Health Officers of Mayuge and Iganga districts for their cooperation,  
460 mobilization and ensuring that data collection went on smoothly. We also extend our sincere  
461 appreciation to the research assistants and all respondents in Iganga and Mayuge for sparing  
462 their time to contribute to this piece of work.

## 463 **References**

- 464 1. Sarker AR, Sultana M, Mahumud RA, Ahmed S, Islam Z, Morton A, et al. Determinants of  
465 enrollment of informal sector workers in cooperative based health scheme in Bangladesh. PLoS  
466 one. 2017;12(7):e0181706.
- 467 2. Kiwanuka S, Ekirapa E, Peterson S, Okui O, Rahman MH, Peters D, et al. Access to and  
468 utilisation of health services for the poor in Uganda: a systematic review of available evidence.  
469 Transactions of the Royal Society of Tropical Medicine and Hygiene. 2008;102(11):1067-74.
- 470 3. WHO. Health Systems Financing: The Path to Universal Coverage. Geneva: World Health  
471 Organization 2010.
- 472 4. World Bank. Financing health in low-income countries. Washington DC: World Bank  
473 Group; 2010.
- 474 5. MoH. National Health Accounts 2018/19-2020/21 Report. 2021.
- 475 6. Tashobya CK, Ssenooba F, Cruz VO, Yates R, Murindwa G, McPake B. Health systems  
476 reforms in Uganda: processes and outputs. Christine Kirunga Tashobya FS and, Valeria Oliveira  
477 Cruz, editors. 2006.

- 478 7. UBOS. The National Population and Housing Census 2014 – Main Report. Kampala,  
479 Uganda: Uganda Bureau of Statistics; 2016.
- 480 8. Twaweza. Health Check: Ugandans' experiences and opinions on health services  
481 Uganda: Twaweza; 2019 [Available from: <https://www.twaweza.org/go/szw-ug-health-check>].
- 482 9. Gottret P, Schieber G. Health financing revisited: a practitioner's guide: The World Bank;  
483 2006.
- 484 10. Xu K, Evans DB, Carrin G, Aguilar-Rivera AM, Musgrove P, Evans T. Protecting  
485 households from catastrophic health spending. *Health affairs*. 2007;26(4):972-83.
- 486 11. De Allegri M, Sanon M, Bridges J, Sauerborn R. Understanding consumers' preferences  
487 and decision to enrol in community-based health insurance in rural West Africa. *Health policy*.  
488 2006;76(1):58-71.
- 489 12. Kyomugisha E, Buregyeya E, Ekirapa E, Mugisha J, Bazeyo W. Strategies for sustainability  
490 and equity of prepayment health schemes in Uganda. *African health sciences*. 2009;9(2).
- 491 13. Basaza R, Alier PK, Kirabira P, Ogubi D, Lako RLL. Willingness to pay for National Health  
492 Insurance Fund among public servants in Juba City, South Sudan: a contingent evaluation.  
493 *International journal for equity in health*. 2017;16(1):158.
- 494 14. Nguyen H, Knowles J. Demand for voluntary health insurance in developing countries:  
495 the case of Vietnam's school-age children and adolescent student health insurance program.  
496 *Social Science & Medicine*. 2010;71(12):2074-82.
- 497 15. Acharya A, Vellakkal S, Taylor F, Masset E, Satija A, Burke M, et al. Impact of National  
498 Health Insurance for the Poor and the Informal sector in Low-and Middle-Income Countries.

- 499 London: EPPI-Centre, Social Science Research Unit, Institute of Education, University of London;  
500 2012.
- 501 16. Basaza R, Criel B, Van der Stuyft P. Community health insurance in Uganda: why does  
502 enrolment remain low? A view from beneath. *Health Policy*. 2008;87(2):172-84.
- 503 17. Jowett M, Kutzin J, Organization WH. Raising revenues for health in support of UHC:  
504 strategic issues for policy makers. World Health Organization; 2015.
- 505 18. Gustafsson-Wright E, Asfaw A, van der Gaag J. Willingness to pay for health insurance:  
506 An analysis of the potential market for new low-cost health insurance products in Namibia.  
507 *Social science & medicine*. 2009;69(9):1351-9.
- 508 19. Russell S, Fox-Rushby J, Arhina D. Willingness and ability to pay for health care: a  
509 selection of methods and issues. *Health Policy and Planning*. 1995;10(1):94-101.
- 510 20. Mitchell RC, Carson RT. Using surveys to value public goods: the contingent valuation  
511 method: Rff Press; 2013.
- 512 21. Kish L. Survey sampling. Inc., New York.: John Wiley and Sons; 1965.
- 513 22. Whittington D, Smith VK, Okorafor A, Okore A, Liu JL, McPhail A. Giving respondents  
514 time to think in contingent valuation studies: a developing country application. *Journal of*  
515 *Environmental Economics and Management*. 1992;22(3):205-25.
- 516 23. Dong H, Kouyate B, Cairns J, Sauerborn R. A comparison of the reliability of the take-it-  
517 or-leave-it and the bidding game approaches to estimating willingness-to-pay in a rural  
518 population in West Africa. *Social Science & Medicine*. 2003;56(10):2181-9.

- 519 24. Barasa EW, Mwaura N, Rogo K, Andrawes L. Extending voluntary health insurance to the  
520 informal sector: experiences and expectations of the informal sector in Kenya. Wellcome open  
521 research. 2017;2.
- 522 25. Nosratnejad S, Rashidian A, Mehrara M, Sari AA, Mahdavi G, Moeini M. Willingness to  
523 pay for social health Insurance in Iran. Global journal of health science. 2014;6(5):154.
- 524 26. Habte A, Tamene A, Ejajo T, Dessu S, Endale F, Gizachew A, et al. Towards universal  
525 health coverage: The level and determinants of enrollment in the Community-Based Health  
526 Insurance (CBHI) scheme in Ethiopia: A systematic review and meta-analysis. PloS one.  
527 2022;17(8):e0272959.
- 528 27. Shaikh BT, Noorani Q, Abbas S. Community based saving groups: an innovative approach  
529 to overcome the financial and social barriers in health care seeking by the women in the rural  
530 remote communities of Pakistan. Archives of Public Health. 2017;75(1):57.
- 531 28. Mutebi A, Muhumuza Kananura R, Ekirapa-Kiracho E, Bua J, Namusoke Kiwanuka S,  
532 Nammazi G, et al. Characteristics of community savings groups in rural Eastern Uganda:  
533 opportunities for improving access to maternal health services. Global health action.  
534 2017;10(sup4):1347363.
- 535 29. Kotoh AM, Aryeetey GC, Van der Geest S. Factors that influence enrolment and  
536 retention in Ghana' National Health Insurance Scheme. International journal of health policy  
537 and management. 2018;7(5):443.
- 538 30. Odeyemi IA. Community-based health insurance programmes and the national health  
539 insurance scheme of Nigeria: challenges to uptake and integration. International journal for  
540 equity in health. 2014;13(1):20.

- 541 31. Mebratie AD, Sparrow R, Yilma Z, Alemu G, Bedi AS. Enrollment in Ethiopia's  
542 community-based health insurance scheme. *World Development*. 2015;74:58-76.
- 543 32. Jofre-Bonet M, Kamara J. Willingness to pay for health insurance in the informal sector  
544 of Sierra Leone. *PloS one*. 2018;13(5):e0189915.
- 545 33. Khatiwada B, Ghimire S, N S. Willingness to pay for health insurance in mangalbare  
546 village development committee of illam district. *MOJ Public Health*. 2017;5(2):43-6.
- 547 34. Mathiyazaghan K. Willingness to pay for rural health insurance through community  
548 participation in India. *The International journal of health planning and management*.  
549 1998;13(1):47-67.
- 550 35. Donfouet HPP, Mahieu P-A, Malin E. Using respondents' uncertainty scores to mitigate  
551 hypothetical bias in community-based health insurance studies. *The European Journal of Health*  
552 *Economics*. 2013;14(2):277-85.
- 553 36. Oriakhi H, Onemolease E. Determinants of rural household's willingness to participate in  
554 community based health insurance scheme in Edo State, Nigeria. *Studies on ethno-medicine*.  
555 2012;6(2):95-102.
- 556 37. Adebayo EF, Uthman OA, Wiysonge CS, Stern EA, Lamont KT, Ataguba JE. A systematic  
557 review of factors that affect uptake of community-based health insurance in low-income and  
558 middle-income countries. *BMC health services research*. 2015;15(1):543.
- 559 38. Dror DM, Hossain SS, Majumdar A, Koehlmoos TLP, John D, Panda PK. What factors  
560 affect voluntary uptake of community-based health insurance schemes in low-and middle-  
561 income countries? A systematic review and meta-analysis. *PLoS One*. 2016;11(8):e0160479.

562
